# Supplementary material
Source: PubMed Central journal article supplement (PMC8928414)
Supplement: sj-pdf-1-jct-10.1177_23800844211012660.pdf [file sj-pdf-1-jct-10.1177_23800844211012660.pdf]

## Supplemental Appendix

### Disparities in dental service use among adult populations in the U.S.

Yan Yan Wu <sup>1</sup>, Wei Zhang <sup>2</sup>, Bei Wu <sup>3,\*</sup>

1. Office of Public Health Studies, University of Hawai‘i at Mānoa  
1960 East-West Road, Honolulu, Hawai‘i 96822. Email: [yywu@hawaii.edu](mailto:yywu@hawaii.edu)
2. Department of Sociology, University of Hawai‘i at Mānoa  
2424 Maile Way, Honolulu, Hawai‘i 96822. Email: [weizhang@hawaii.edu](mailto:weizhang@hawaii.edu)
- 3.\* Corresponding author, Rory Meyers College of Nursing, New York University  
433 First Avenue, New York, New York, 10010. Phone: (212) 992-5951. Email: [bei.wu@nyu.edu](mailto:bei.wu@nyu.edu)

**Appendix Table 1.** Sample size, proportion (%), and weighted proportion (wt%) by race/ethnicity and sample size by age group from 2002 to 2018 even years.

| Year | White  |      |      | Hispanic |     |      | Black |     |      | Asian |     |     | AIAN |     |     | NHOPI |     |      |
|------|--------|------|------|----------|-----|------|-------|-----|------|-------|-----|-----|------|-----|-----|-------|-----|------|
|      | N      | %    | wt%  | N        | %   | wt%  | N     | %   | wt%  | N     | %   | wt% | N    | %   | wt% | N     | %   | wt%  |
| 2002 | 167426 | 80.2 | 72.2 | 15494    | 7.4 | 13.4 | 16166 | 7.7 | 9.7  | 4980  | 2.4 | 3.1 | 3238 | 1.6 | 1.2 | 1378  | 0.7 | 0.39 |
| 2004 | 209526 | 80.8 | 71.7 | 19904    | 7.7 | 14.6 | 22222 | 8.6 | 9.8  | 2881  | 1.1 | 2.5 | 4157 | 1.6 | 1.1 | 488   | 0.2 | 0.36 |
| 2006 | 243617 | 80.8 | 71.8 | 22487    | 7.5 | 14.5 | 24438 | 8.1 | 9.4  | 5339  | 1.8 | 2.7 | 4420 | 1.5 | 1.2 | 1192  | 0.4 | 0.44 |
| 2008 | 286846 | 81.5 | 70.4 | 24603    | 7.0 | 14.9 | 27622 | 7.8 | 10.0 | 6308  | 1.8 | 3.1 | 5057 | 1.4 | 1.1 | 1571  | 0.4 | 0.42 |
| 2010 | 309247 | 81.0 | 70.9 | 27406    | 7.2 | 14.0 | 30555 | 8.0 | 9.9  | 7439  | 1.9 | 3.7 | 5533 | 1.4 | 1.2 | 1507  | 0.4 | 0.38 |
| 2012 | 319659 | 79.5 | 66.4 | 30893    | 7.7 | 16.0 | 33896 | 8.4 | 11.6 | 8858  | 2.2 | 4.6 | 6200 | 1.5 | 1.1 | 2406  | 0.6 | 0.33 |
| 2014 | 315594 | 80.1 | 66.0 | 30702    | 7.8 | 16.2 | 29876 | 7.6 | 11.7 | 8733  | 2.2 | 4.8 | 6384 | 1.6 | 1.0 | 2605  | 0.7 | 0.31 |
| 2016 | 327145 | 79.0 | 65.0 | 33977    | 8.2 | 16.6 | 34115 | 8.2 | 11.8 | 9921  | 2.4 | 5.3 | 6603 | 1.6 | 1.0 | 2279  | 0.6 | 0.27 |
| 2018 | 288390 | 78.0 | 64.6 | 31946    | 8.6 | 17.0 | 30927 | 8.4 | 11.8 | 9084  | 2.5 | 5.3 | 6805 | 1.8 | 1.0 | 2486  | 0.7 | 0.26 |

| Year | 20-49  |    |      | 50-64  |    |      | 65+    |    |      |
|------|--------|----|------|--------|----|------|--------|----|------|
|      | N      | %  | wt%  | N      | %  | wt%  | N      | %  | wt%  |
| 2002 | 122529 | 59 | 64.7 | 50837  | 24 | 21.3 | 35316  | 17 | 14.0 |
| 2004 | 139420 | 54 | 63.3 | 71070  | 27 | 22.4 | 48688  | 19 | 14.3 |
| 2006 | 140434 | 47 | 61.3 | 93641  | 31 | 24.1 | 67418  | 22 | 14.6 |
| 2008 | 142426 | 41 | 59.9 | 117802 | 34 | 25.2 | 91779  | 26 | 14.9 |
| 2010 | 133565 | 35 | 58.1 | 132865 | 35 | 26.3 | 115257 | 30 | 15.6 |
| 2012 | 152661 | 38 | 56.2 | 132624 | 33 | 27.1 | 116627 | 29 | 16.7 |
| 2014 | 138569 | 35 | 55.0 | 131123 | 33 | 27.4 | 124202 | 32 | 17.6 |
| 2016 | 145588 | 35 | 54.7 | 131859 | 32 | 26.7 | 136593 | 33 | 18.6 |
| 2018 | 135846 | 37 | 53.9 | 111204 | 30 | 26.5 | 122588 | 33 | 19.6 |

**Appendix Table 2.** Crude and adjusted weighted prevalence of dental service utilization from 2002 to 2018 (even year) for younger (20-49), middle-aged (50-64) and older adults (65+), difference between adjusted prevalence and crude prevalence (diff: Adjusted - Crude), and average difference for each age group. Variables adjusted in the model: sex, education, income, employment status, health insurance, number of teeth removed and self-rated general health.

| Crude (C)<br>Adjusted (A) |   | White<br>Prev (95CI) diff |             | Hispanic<br>Prev (95CI) diff |             | Black<br>Prev (95CI) diff |            | Asian<br>Prev (95CI) diff |             | AIAN<br>Prev (95CI) diff |            | NHOPI<br>Prev (95CI) diff |            |
|---------------------------|---|---------------------------|-------------|------------------------------|-------------|---------------------------|------------|---------------------------|-------------|--------------------------|------------|---------------------------|------------|
| <b>Age 20-49</b>          |   |                           |             |                              |             |                           |            |                           |             |                          |            |                           |            |
| 2002                      | C | 73.6(73.1,74.1)           |             | 62.6(60.8,64.3)              |             | 65.5(64.0,67.0)           |            | 72.0(68.8,75.0)           |             | 65.0(60.8,69.0)          |            | 67.4(59.5,74.4)           |            |
|                           | A | 72.8(72.2,73.3)           | -0.8        | 72.0(70.3,73.6)              | 9.4         | 70.7(69.1,72.3)           | 5.2        | 66.9(63.1,70.5)           | -5.2        | 72.7(68.4,76.5)          | 7.7        | 69.0(60.9,76.0)           | 1.6        |
| 2004                      | C | 72.3(71.8,72.8)           |             | 61.3(59.6,62.9)              |             | 65.3(63.9,66.7)           |            | 68.6(64.8,72.1)           |             | 63.1(59.0,67.0)          |            | 69.4(60.1,77.4)           |            |
|                           | A | 71.3(70.7,72.0)           | -1.0        | 72.0(70.4,73.5)              | 10.7        | 70.8(69.3,72.2)           | 5.4        | 64.4(60.2,68.4)           | -4.2        | 70.4(66.3,74.2)          | 7.3        | 69.6(59.7,78.0)           | 0.2        |
| 2006                      | C | 71.1(70.5,71.7)           |             | 59.3(57.5,61.1)              |             | 62.8(61.2,64.4)           |            | 73.2(69.7,76.3)           |             | 62.8(57.9,67.3)          |            | 67.8(58.4,75.9)           |            |
|                           | A | 69.4(68.7,70.1)           | -1.7        | 71.4(69.6,73.1)              | 12.1        | 69.0(67.3,70.6)           | 6.2        | 66.7(62.6,70.6)           | -6.5        | 71.2(66.6,75.4)          | 8.4        | 69.6(60.1,77.7)           | 1.8        |
| 2008                      | C | 70.9(70.4,71.4)           |             | 61.2(59.6,62.7)              |             | 61.5(59.9,63.2)           |            | 72.7(69.7,75.6)           |             | 60.6(56.1,64.9)          |            | 66.8(59.2,73.6)           |            |
|                           | A | 69.4(68.7,70.0)           | -1.5        | 72.6(71.1,74.1)              | 11.4        | 67.8(66.0,69.4)           | 6.2        | 67.0(63.1,70.7)           | -5.7        | 70.6(66.5,74.3)          | 10.0       | 70.6(62.6,77.6)           | 3.8        |
| 2010                      | C | 71.1(70.6,71.6)           |             | 57.9(56.5,59.3)              |             | 61.7(60.3,63.2)           |            | 69.6(66.9,72.2)           |             | 57.4(53.0,61.8)          |            | 57.8(50.6,64.7)           |            |
|                           | A | 68.9(68.2,69.5)           | -2.2        | 69.5(68.1,71.0)              | 11.6        | 68.7(67.1,70.2)           | 7.0        | 61.9(58.7,65.0)           | -7.7        | 67.7(63.1,72.0)          | 10.3       | 56.9(49.0,64.5)           | -0.9       |
| 2012                      | C | 67.4(66.9,67.9)           |             | 56.4(55.1,57.7)              |             | 58.9(57.5,60.3)           |            | 68.8(66.4,71.1)           |             | 58.0(54.4,61.6)          |            | 65.6(60.3,70.5)           |            |
|                           | A | 67.4(66.8,68.0)           | 0.0         | 71.0(69.7,72.3)              | 14.6        | 67.9(66.5,69.4)           | 9.0        | 63.8(61.0,66.6)           | -4.9        | 67.2(63.5,70.6)          | 9.1        | 69.7(64.0,74.9)           | 4.1        |
| 2014                      | C | 66.6(66.1,67.1)           |             | 55.3(54.0,56.5)              |             | 57.7(56.3,59.1)           |            | 66.7(64.2,69.1)           |             | 55.2(51.8,58.5)          |            | 62.2(56.6,67.6)           |            |
|                           | A | 67.0(66.3,67.6)           | 0.4         | 69.8(68.5,71.0)              | 14.5        | 66.7(65.2,68.1)           | 9.0        | 62.6(59.7,65.4)           | -4.1        | 64.1(60.5,67.5)          | 8.9        | 66.8(61.4,71.7)           | 4.5        |
| 2016                      | C | 67.6(67.0,68.1)           |             | 58.3(57.1,59.5)              |             | 61.2(59.9,62.5)           |            | 71.1(69.0,73.0)           |             | 55.6(52.4,58.9)          |            | 63.1(57.3,68.6)           |            |
|                           | A | 67.3(66.7,68.0)           | -0.2        | 70.7(69.5,71.9)              | 12.4        | 68.5(67.1,69.8)           | 7.3        | 65.8(63.4,68.2)           | -5.2        | 63.9(60.5,67.2)          | 8.3        | 68.8(63.1,74.0)           | 5.7        |
| 2018                      | C | 67.5(66.9,68.0)           |             | 59.5(58.2,60.8)              |             | 62.9(61.6,64.3)           |            | 70.3(68.1,72.5)           |             | 57.0(53.0,60.8)          |            | 63.5(59.0,67.7)           |            |
|                           | A | 67.3(66.5,68.0)           | -0.2        | 71.1(69.7,72.4)              | 11.6        | 69.4(68.0,70.8)           | 6.5        | 65.6(62.9,68.3)           | -4.7        | 66.1(62.3,69.7)          | 9.1        | 68.9(64.1,73.2)           | 5.4        |
|                           |   | <b>Average diff</b>       | <b>-0.8</b> |                              | <b>12.0</b> |                           | <b>6.9</b> |                           | <b>-5.4</b> |                          | <b>8.8</b> |                           | <b>2.9</b> |
| <b>Age 50-64</b>          |   |                           |             |                              |             |                           |            |                           |             |                          |            |                           |            |
| 2002                      | C | 79.7(79.1,80.3)           |             | 64.7(60.8,68.5)              |             | 63.2(60.2,66.1)           |            | 75.5(66.8,82.5)           |             | 71.8(65.4,77.5)          |            | 51.6(27.8,74.7)           |            |
|                           | A | 79.0(78.3,79.7)           | -0.7        | 75.3(71.8,78.5)              | 10.6        | 71.3(68.5,73.9)           | 8.1        | 70.1(59.8,78.6)           | -5.4        | 78.0(72.2,82.8)          | 6.1        | 55.2(30.7,77.5)           | 3.6        |
| 2004                      | C | 79.3(78.7,79.9)           |             | 63.2(59.8,66.4)              |             | 61.1(58.5,63.6)           |            | 81.5(74.4,87.0)           |             | 64.8(56.9,72.0)          |            | 81.9(65.6,91.5)           |            |
|                           | A | 78.1(77.5,78.8)           | -1.2        | 73.2(70.0,76.2)              | 10.0        | 68.9(66.2,71.5)           | 7.9        | 79.6(71.8,85.6)           | -1.9        | 70.2(62.2,77.1)          | 5.4        | 78.3(60.1,89.6)           | -3.6       |
| 2006                      | C | 78.2(77.6,78.7)           |             | 60.8(57.5,64.1)              |             | 59.5(57.2,61.7)           |            | 82.2(77.5,86.2)           |             | 60.5(53.7,66.9)          |            | 72.8(54.3,85.8)           |            |
|                           | A | 76.8(76.1,77.4)           | -1.4        | 72.4(69.5,75.2)              | 11.6        | 68.0(65.7,70.2)           | 8.5        | 79.7(73.7,84.5)           | -2.6        | 68.1(61.7,73.9)          | 7.7        | 72.9(53.7,86.2)           | 0.1        |

|                |   |                     |             |                 |             |                 |            |                 |             |                 |            |                 |            |
|----------------|---|---------------------|-------------|-----------------|-------------|-----------------|------------|-----------------|-------------|-----------------|------------|-----------------|------------|
| 2008           | C | 78.8(78.4,79.3)     |             | 64.7(62.2,67.1) |             | 61.2(59.2,63.2) |            | 81.7(77.8,85.1) |             | 66.0(61.0,70.7) |            | 73.6(63.1,82.0) |            |
|                | A | 77.6(77.1,78.1)     | -1.2        | 76.1(73.9,78.2) | 11.4        | 69.7(67.7,71.6) | 8.5        | 80.1(75.5,84.0) | -1.7        | 73.6(68.9,77.8) | 7.6        | 73.4(64.0,81.1) | -0.3       |
| 2010           | C | 77.0(76.5,77.4)     |             | 63.9(61.9,65.8) |             | 61.4(59.8,63.0) |            | 75.4(71.7,78.8) |             | 63.9(59.4,68.2) |            | 72.1(60.6,81.2) |            |
|                | A | 75.8(75.3,76.2)     | -1.2        | 75.8(74.0,77.4) | 11.9        | 70.5(68.9,72.1) | 9.1        | 72.6(68.6,76.2) | -2.8        | 73.8(69.1,78.0) | 9.9        | 77.2(65.0,86.1) | 5.1        |
| 2012           | C | 74.6(74.1,75.1)     |             | 60.1(57.9,62.2) |             | 61.1(59.3,62.8) |            | 81.6(77.6,85.0) |             | 58.6(54.1,63.1) |            | 69.4(60.5,77.1) |            |
|                | A | 74.8(74.3,75.3)     | 0.2         | 74.4(72.4,76.3) | 14.3        | 71.5(69.7,73.2) | 10.4       | 80.3(75.4,84.4) | -1.3        | 69.4(65.4,73.1) | 10.8       | 70.7(61.5,78.5) | 1.3        |
| 2014           | C | 73.2(72.7,73.7)     |             | 59.4(57.3,61.5) |             | 60.1(58.4,61.8) |            | 78.1(74.1,81.6) |             | 57.4(52.6,61.9) |            | 63.6(54.9,71.6) |            |
|                | A | 73.8(73.3,74.3)     | 0.6         | 73.5(71.6,75.3) | 14.0        | 69.9(68.3,71.6) | 9.8        | 77.5(72.5,81.8) | -0.6        | 69.0(64.3,73.3) | 11.6       | 70.4(61.4,78.0) | 6.7        |
| 2016           | C | 73.5(73.0,74.0)     |             | 62.1(60.1,64.1) |             | 61.2(59.4,62.9) |            | 79.2(75.4,82.6) |             | 56.9(52.1,61.5) |            | 76.9(69.5,83.0) |            |
|                | A | 74.5(73.9,75.0)     | 1.0         | 75.2(73.4,76.9) | 13.1        | 70.2(68.5,71.9) | 9.0        | 78.2(73.7,82.1) | -1.0        | 67.0(61.6,72.0) | 10.1       | 82.6(72.9,89.3) | 5.7        |
| 2018           | C | 74.5(74.0,75.1)     |             | 61.1(58.7,63.5) |             | 61.9(60.0,63.8) |            | 75.7(71.1,79.8) |             | 58.7(54.1,63.2) |            | 71.2(62.9,78.3) |            |
|                | A | 75.6(74.9,76.2)     | 1.0         | 73.8(71.5,76.1) | 12.7        | 71.3(69.5,73.0) | 9.3        | 74.3(68.9,79.0) | -1.4        | 70.5(66.5,74.2) | 11.8       | 75.9(68.5,82.0) | 4.7        |
|                |   | <b>Average diff</b> | <b>-0.3</b> |                 | <b>12.2</b> |                 | <b>9.0</b> |                 | <b>-2.1</b> |                 | <b>9.0</b> |                 | <b>2.6</b> |
| <b>Age 65+</b> |   |                     |             |                 |             |                 |            |                 |             |                 |            |                 |            |
| 2002           | C | 79.8(79.1,80.6)     |             | 61.9(55.1,68.3) |             | 56.3(51.6,60.8) |            | 70.6(54.2,83.0) |             | 65.7(52.1,77.2) |            | 67.9(51.0,81.2) |            |
|                | A | 80.1(78.9,81.1)     | 0.2         | 68.4(61.7,74.4) | 6.5         | 62.9(58.5,67.1) | 6.6        | 69.2(51.3,82.7) | -1.4        | 68.9(56.0,79.3) | 3.1        | 67.0(53.6,78.1) | -0.9       |
| 2004           | C | 80.5(79.8,81.1)     |             | 64.4(59.3,69.1) |             | 57.4(53.5,61.2) |            | 75.1(57.9,86.8) |             | 64.9(54.2,74.2) |            | 63.1(12.6,95.3) |            |
|                | A | 79.8(78.8,80.8)     | -0.7        | 71.4(66.6,75.8) | 7.0         | 63.0(58.8,67.0) | 5.6        | 72.6(54.1,85.6) | -2.5        | 71.3(61.0,79.8) | 6.5        | 63.8(28.6,88.6) | 0.8        |
| 2006           | C | 80.0(79.5,80.6)     |             | 66.0(62.0,69.8) |             | 55.0(51.6,58.4) |            | 83.6(75.4,89.4) |             | 63.5(53.2,72.8) |            | 54.8(26.9,79.9) |            |
|                | A | 79.7(78.9,80.6)     | -0.3        | 74.0(70.0,77.6) | 8.0         | 62.7(59.1,66.2) | 7.7        | 82.2(73.7,88.4) | -1.4        | 69.3(58.0,78.7) | 5.8        | 57.9(28.9,82.3) | 3.1        |
| 2008           | C | 80.3(79.8,80.7)     |             | 67.5(64.4,70.5) |             | 59.9(57.3,62.4) |            | 80.2(74.3,84.9) |             | 57.9(49.7,65.6) |            | 73.6(57.0,85.4) |            |
|                | A | 79.7(79.0,80.3)     | -0.6        | 74.2(71.2,77.0) | 6.7         | 65.9(63.2,68.5) | 6.0        | 80.4(73.8,85.6) | 0.2         | 63.9(55.7,71.5) | 6.1        | 74.1(57.5,85.8) | 0.5        |
| 2010           | C | 79.7(79.3,80.1)     |             | 63.3(60.6,65.8) |             | 60.3(58.3,62.3) |            | 78.5(73.8,82.5) |             | 65.4(59.3,71.1) |            | 72.9(61.4,81.9) |            |
|                | A | 79.2(78.6,79.7)     | -0.6        | 72.4(70.1,74.6) | 9.1         | 67.0(64.7,69.1) | 6.6        | 77.6(72.7,81.8) | -0.9        | 71.8(66.2,76.9) | 6.4        | 75.8(64.5,84.4) | 3.0        |
| 2012           | C | 77.9(77.4,78.3)     |             | 61.7(58.7,64.7) |             | 55.0(52.4,57.6) |            | 75.5(68.0,81.8) |             | 58.0(51.4,64.3) |            | 69.1(54.6,80.7) |            |
|                | A | 77.4(76.7,78.1)     | -0.5        | 71.1(68.2,73.9) | 9.4         | 61.9(59.1,64.6) | 6.9        | 74.9(67.3,81.3) | -0.6        | 64.1(56.7,70.8) | 6.1        | 71.0(58.8,80.8) | 1.9        |
| 2014           | C | 77.1(76.6,77.6)     |             | 61.9(59.1,64.7) |             | 54.5(52.0,56.9) |            | 80.0(74.6,84.5) |             | 58.1(52.2,63.7) |            | 38.7(25.3,54.0) |            |
|                | A | 77.3(76.7,78.0)     | 0.2         | 73.5(70.9,76.0) | 11.6        | 62.1(59.5,64.6) | 7.6        | 77.1(70.5,82.5) | -2.9        | 66.1(60.4,71.4) | 8.0        | 43.7(27.3,61.6) | 5.0        |
| 2016           | C | 77.2(76.7,77.7)     |             | 61.0(58.2,63.6) |             | 60.8(58.5,63.1) |            | 77.6(71.7,82.6) |             | 65.2(59.5,70.6) |            | 60.3(46.7,72.5) |            |
|                | A | 77.4(76.7,78.0)     | 0.2         | 71.0(68.4,73.4) | 10.0        | 68.1(65.6,70.5) | 7.3        | 78.3(72.0,83.4) | 0.7         | 70.5(65.1,75.4) | 5.3        | 64.0(51.0,75.2) | 3.7        |
| 2018           | C | 77.7(77.2,78.3)     |             | 65.6(62.6,68.5) |             | 58.6(55.9,61.3) |            | 73.5(65.5,80.2) |             | 60.5(54.7,66.0) |            | 71.5(62.8,79.0) |            |
|                | A | 78.1(77.3,78.8)     | 0.3         | 75.9(73.2,78.3) | 10.2        | 66.2(63.4,68.8) | 7.6        | 72.8(64.6,79.6) | -0.7        | 68.4(62.5,73.8) | 7.9        | 75.2(65.9,82.6) | 3.6        |
|                |   | <b>Average diff</b> | <b>-0.2</b> |                 | <b>8.7</b>  |                 | <b>6.9</b> |                 | <b>-1.1</b> |                 | <b>6.1</b> |                 | <b>2.3</b> |

**Appendix Table 3.** Mean prevalence and rate of change per year of dental service utilization from 2012 to 2018 for Whites, Blacks, Hispanics, Asian, AIAN and NHOPI younger (20-49), middle-aged (50-64) and older adults (65+) estimated from the linear regression analysis of the adjusted wave-specific prevalences.

| Race/ethnicity | Age group | Mean prevalence 2002-2018 |        |      | Slope (change per year) between 2002-2018 |       |        |       |        |
|----------------|-----------|---------------------------|--------|------|-------------------------------------------|-------|--------|-------|--------|
|                |           | Prev                      | 95% CI |      | p                                         | Slope | 95% CI |       | p      |
| White          | 65+       | 78.7                      | 78.2   | 79.2 | <0.001                                    | -0.19 | -0.28  | -0.09 | 0.002  |
| Asian          | 50-64     | 76.9                      | 73.8   | 80.0 | <0.001                                    | 0.07  | -0.53  | 0.68  | 0.787  |
| White          | 50-64     | 76.2                      | 75.4   | 77.0 | <0.001                                    | -0.28 | -0.43  | -0.13 | 0.003  |
| Asian          | 65+       | 76.1                      | 72.7   | 79.5 | <0.001                                    | 0.13  | -0.53  | 0.80  | 0.654  |
| Hispanic       | 50-64     | 74.4                      | 73.4   | 75.5 | <0.001                                    | 0.00  | -0.20  | 0.21  | 0.968  |
| NHOPI          | 50-64     | 73.0                      | 67.4   | 78.5 | <0.001                                    | 0.73  | -0.34  | 1.80  | 0.150  |
| Hispanic       | 65+       | 72.4                      | 70.8   | 74.1 | <0.001                                    | 0.21  | -0.11  | 0.52  | 0.165  |
| Hispanic       | 20-49     | 71.1                      | 70.4   | 71.8 | <0.001                                    | -0.10 | -0.24  | 0.03  | 0.120  |
| AIAN           | 50-64     | 71.1                      | 68.6   | 73.5 | <0.001                                    | -0.35 | -0.82  | 0.12  | 0.120  |
| Black          | 50-64     | 70.1                      | 69.2   | 71.1 | <0.001                                    | 0.08  | -0.10  | 0.26  | 0.325  |
| White          | 20-49     | 69.0                      | 68.3   | 69.6 | <0.001                                    | -0.34 | -0.46  | -0.22 | <0.001 |
| Black          | 20-49     | 68.8                      | 67.9   | 69.8 | <0.001                                    | -0.14 | -0.32  | 0.04  | 0.117  |
| AIAN           | 65+       | 68.3                      | 65.8   | 70.7 | <0.001                                    | -0.09 | -0.56  | 0.39  | 0.675  |
| AIAN           | 20-49     | 68.2                      | 67.1   | 69.3 | <0.001                                    | -0.53 | -0.74  | -0.31 | <0.001 |
| NHOPI          | 20-49     | 67.8                      | 64.2   | 71.3 | <0.001                                    | -0.08 | -0.76  | 0.60  | 0.792  |
| NHOPI          | 65+       | 65.8                      | 57.2   | 74.5 | <0.001                                    | 0.01  | -1.66  | 1.69  | 0.984  |
| Asian          | 20-49     | 65.0                      | 63.4   | 66.5 | <0.001                                    | -0.10 | -0.40  | 0.20  | 0.449  |
| Black          | 65+       | 64.4                      | 62.6   | 66.2 | <0.001                                    | 0.19  | -0.15  | 0.54  | 0.225  |

**Appendix Table 4.** STROBE Checklist of cross-sectional studies.

|                              | <b>Item No</b> | <b>Recommendation</b>                                                                                                                                                                             |                                                                                |
|------------------------------|----------------|---------------------------------------------------------------------------------------------------------------------------------------------------------------------------------------------------|--------------------------------------------------------------------------------|
| <b>Title and abstract</b>    | 1              | (a) Indicate the study's design with a commonly used term in the title or the abstract                                                                                                            | Indicated the cross-sectional study design in the abstract.                    |
|                              |                | (b) Provide in the abstract an informative and balanced summary of what was done and what was found                                                                                               | Provided balanced information of study design, statistical methods and results |
| <b>Introduction</b>          |                |                                                                                                                                                                                                   |                                                                                |
| Background/rationale         | 2              | Explain the scientific background and rationale for the investigation being reported                                                                                                              | Included in the Introduction sections                                          |
| Objectives                   | 3              | State specific objectives, including any prespecified hypotheses                                                                                                                                  | Included in the Introduction sections                                          |
| <b>Methods</b>               |                |                                                                                                                                                                                                   |                                                                                |
| Study design                 | 4              | Present key elements of study design early in the paper                                                                                                                                           | Method/data section                                                            |
| Setting                      | 5              | Describe the setting, locations, and relevant dates, including periods of recruitment, exposure, follow-up, and data collection                                                                   | Method/data section                                                            |
| Participants                 | 6              | (a) Give the eligibility criteria, and the sources and methods of selection of participants                                                                                                       | Method/data source section                                                     |
| Variables                    | 7              | Clearly define all outcomes, exposures, predictors, potential confounders, and effect modifiers. Give diagnostic criteria, if applicable                                                          | Method/data source section                                                     |
| Data sources/<br>measurement | 8*             | For each variable of interest, give sources of data and details of methods of assessment (measurement). Describe comparability of assessment methods if there is more than one group              | Method/measures section                                                        |
| Bias                         | 9              | Describe any efforts to address potential sources of bias                                                                                                                                         | Discussion section                                                             |
| Study size                   | 10             | Explain how the study size was arrived at                                                                                                                                                         | Method/Statistical analysis section                                            |
| Quantitative variables       | 11             | Explain how quantitative variables were handled in the analyses. If applicable, describe which groupings were chosen and why                                                                      | Method/measures section                                                        |
| Statistical methods          | 12             | (a) Describe all statistical methods, including those used to control for confounding                                                                                                             | Method/Statistical analysis section                                            |
|                              |                | (b) Describe any methods used to examine subgroups and interactions                                                                                                                               | Method/Statistical analysis section                                            |
|                              |                | (c) Explain how missing data were addressed                                                                                                                                                       | Method/Statistical analysis section                                            |
|                              |                | (d) If applicable, describe analytical methods taking account of sampling strategy                                                                                                                | Method/Statistical analysis section                                            |
|                              |                | (e) Describe any sensitivity analyses                                                                                                                                                             | N/A                                                                            |
| <b>Results</b>               |                |                                                                                                                                                                                                   |                                                                                |
| Participants                 | 13*            | (a) Report numbers of individuals at each stage of study—eg numbers potentially eligible, examined for eligibility, confirmed eligible, included in the study, completing follow-up, and analysed | Figure 1.                                                                      |
|                              |                | (b) Give reasons for non-participation at each stage                                                                                                                                              | See measures                                                                   |
|                              |                | (c) Consider use of a flow diagram                                                                                                                                                                | Figure 1                                                                       |

|                          |     |                                                                                                                                                                                                              |                                                            |
|--------------------------|-----|--------------------------------------------------------------------------------------------------------------------------------------------------------------------------------------------------------------|------------------------------------------------------------|
| Descriptive data         | 14* | (a) Give characteristics of study participants (eg demographic, clinical, social) and information on exposures and potential confounders                                                                     | Results/sample characteristics                             |
|                          |     | (b) Indicate number of participants with missing data for each variable of interest                                                                                                                          | Results/sample characteristics                             |
| Outcome data             | 15* | Report numbers of outcome events or summary measures                                                                                                                                                         |                                                            |
| Main results             | 16  | (a) Give unadjusted estimates and, if applicable, confounder-adjusted estimates and their precision (eg, 95% confidence interval). Make clear which confounders were adjusted for and why they were included | Both provided in Figure and Tables                         |
|                          |     | (b) Report category boundaries when continuous variables were categorized                                                                                                                                    | N/A                                                        |
|                          |     | (c) If relevant, consider translating estimates of relative risk into absolute risk for a meaningful time period                                                                                             | N/A                                                        |
| Other analyses           | 17  | Report other analyses done—eg analyses of subgroups and interactions, and sensitivity analyses                                                                                                               | N/A                                                        |
| <b>Discussion</b>        |     |                                                                                                                                                                                                              |                                                            |
| Key results              | 18  | Summarise key results with reference to study objectives                                                                                                                                                     | Done!                                                      |
| Limitations              | 19  | Discuss limitations of the study, taking into account sources of potential bias or imprecision. Discuss both direction and magnitude of any potential bias                                                   | Done!                                                      |
| Interpretation           | 20  | Give a cautious overall interpretation of results considering objectives, limitations, multiplicity of analyses, results from similar studies, and other relevant evidence                                   | Done!                                                      |
| Generalisability         | 21  | Discuss the generalisability (external validity) of the study results                                                                                                                                        | Yes population based study, mentioned throughout the paper |
| <b>Other information</b> |     |                                                                                                                                                                                                              |                                                            |
| Funding                  | 22  | Give the source of funding and the role of the funders for the present study and, if applicable, for the original study on which the present article is based                                                | Included in the Acknowledgement                            |
